# Supplementary material for: Room-temperature synthesis of air-stable cobalt nanoparticles and their highly efficient adsorption ability for Congo red
Source: Royal Society of Chemistry journal article supplement (doi:10.1039/c2ra20240a), 2012-01-01
Supplement: c2ra20240a.pdf [file c2ra20240a.pdf]

## Room-temperature synthesis of air-stable cobalt nanoparticles and their high-efficient adsorption ability for Congo red

Xiaoming Liang, Lijun Zhao\*

Key Laboratory of Automobile Materials (Jilin University), Ministry of Education and School of Materials Science and Engineering, Jilin University, Changchun 130022, China.

E-mail: [lijunzhao@jlu.edu.cn](mailto:lijunzhao@jlu.edu.cn)

Tel: (+86)431-85095878. Fax: (+86)431-85095876

### Batch adsorption experiments

A standard CR solution with an initial concentration of  $150 \text{ mg}\cdot\text{L}^{-1}$  was firstly prepared. Then, 5 mg of cobalt powders were added to 50 mL of the above solution under stirring. After a specified time, the solid and liquid were separated by a magnet and UV-vis adsorption spectra were measured by an Agilent Cary 50 UV-vis spectrophotometer to determine the CR concentration in remaining solutions.

The equilibrium adsorbed concentration,  $q_e$ , was calculated according to the equation:

$$q_e = \frac{(C_0 - C_e) \times V}{W} \quad (1)$$

where  $C_0$  is the initial concentration of CR,  $\text{mg}\cdot\text{dm}^{-3}$ ;  $C_e$  is the equilibrium concentration in solution,  $\text{mg}\cdot\text{dm}^{-3}$ ;  $V$  is the total volume of the solution,  $\text{dm}^3$ ; and  $W$  is the dry mass of the Co nanoparticle, g.

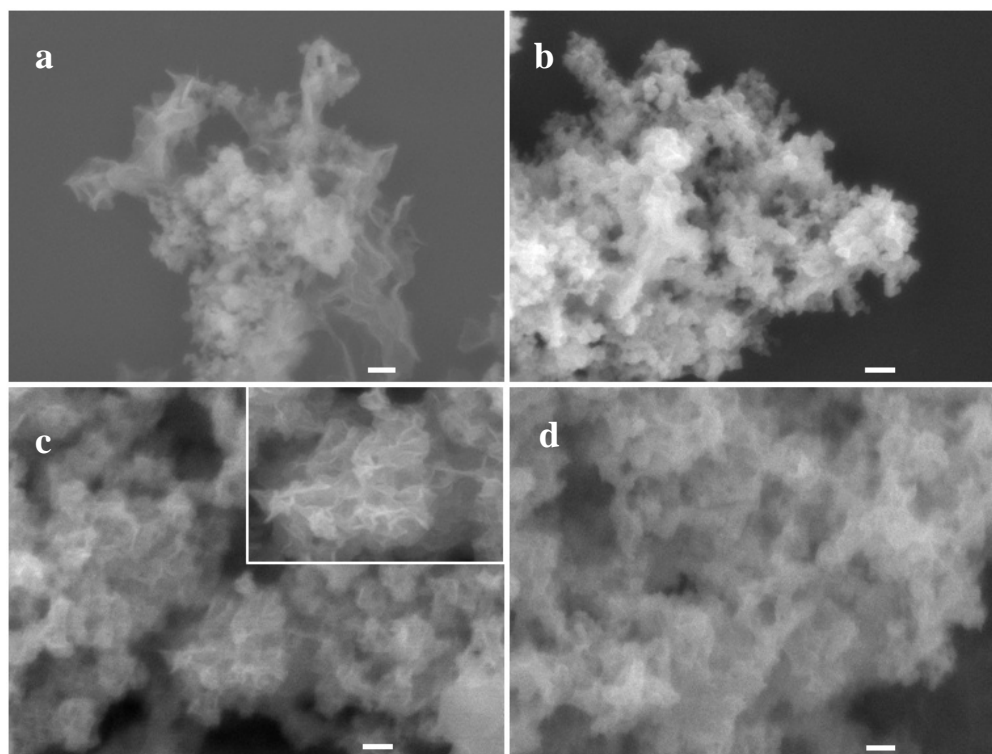

**Fig. S1** FESEM images of Co nanoparticles prepared by using different molar ratio of  $\text{CoCl}_2 \cdot 6\text{H}_2\text{O}$  and  $\text{NaBH}_4$ : (a) 3.2:1, (b) 0.64:1, (c) 0.16:1 and (d) 0.064:1. Scale bar is 100 nm.

When the molar ratio is 3.2:1, small particles and lamellar structure are observed. Not enough dosage of  $\text{NaBH}_4$  goes against the formation of single-phase Co. Small aggregated particles with particle sizes about 15 nm can be seen from Fig. S1b, and the molar ratio of  $\text{CoCl}_2 \cdot 6\text{H}_2\text{O}$  and  $\text{NaBH}_4$  is 0.64:1. Further decreasing the molar ratio to 0.16:1 and 0.064:1, the SEM images show that the as-prepared Co nanoparticles possess hierarchical structure and sponge morphology, respectively. Herein, the hierarchical structure is composed lamellae with a thickness of around 8 nm. Excessive  $\text{NaBH}_4$  can assure the formation of single-phase Co, but it may not favor the Co nanoparticles with better properties for its future application, because the morphologies of nanoparticles have some influences on the properties.

**Table S2** Adsorption capacities of CR dye on various adsorbents

| Type of adsorbent                        | $q_{max}(\text{mg}\cdot\text{g}^{-1})$ | References |
|------------------------------------------|----------------------------------------|------------|
| Chitosan hydrogel beads impregnated with |                                        |            |
| carbon nanotubesCS/CNT                   | 450.40                                 | [14]       |
| Maghemite nanoparticles                  | 208.33                                 | [15]       |
| Cattail root                             | 38.79                                  | [16]       |
| Palm kernel seed coat                    | 66.23                                  | [17]       |
| Marine alga                              | 71.46                                  | [18]       |
| CTAB modified chitosan beads             | 352.50                                 | [19]       |
| CS/CTAB beads                            | 373.29                                 | [20]       |
| Fe <sub>3</sub> O <sub>4</sub> @mesoC    | 1656.9                                 | [21]       |
| Co (R. T.)                               | 800                                    | This study |
| Co (100 °C)                              | 800                                    | This study |
| Co (160 °C)                              | 1324.5                                 | This study |
| Co (200 °C)                              | 1165.6                                 | This study |
| Co (220 °C)                              | 1015.6                                 | This study |

### **Synthesis of Co nanoparticles at different temperature**

Twenty mL of aqueous solution containing 0.1 g of CoCl<sub>2</sub>·6H<sub>2</sub>O was first prepared in Teflon-lined stainless steel autoclaves of 30 mL capacity, and subsequently 0.2 g NaBH<sub>4</sub> was added to the autoclaves with stirring. The autoclaves were sealed and heated at different temperatures for 2 h, then cooled naturally to room temperature. The as-formed grayish-black precipitates were collected by a magnet and washed them with deionized water and ethanol for several times. The final powders were dried at room temperature in the air for 24 h.

Compared with other Co samples synthesized at different temperature, although the Co nanoparticles prepared at room-temperature is not with the highest adsorption

ability for CR, it owns the shortest adsorption time (2 min), that is to say, Co nanoparticles synthesized at room temperature show the highest adsorption efficiency. In addition, Cobalt nanoparticles synthesized at room temperature are the best compromise between using an affordable method—from the economical point of view—and getting reasonable good adsorption properties.

## References

- 14 S. Chatterjee, D.S. Lee, M. W. Lee and S. H. Woo, *Bioresour. Technol.*, 2010, **101**, 1800–1806.
- 15 A. Afkhami, R. Moosavi, *J. Hazard. Mater.*, 2010, **174**, 398–403.
- 16 V. Vimonsesa, S. Lei, B. Jin, C. W. K. Chow and C. Saint, *Chem. Eng. J.*, 2009, **148**, 354–364.
- 17 T. Tuutijarvi, J. Lu, M. Sillanpaa and G. Chen, *J. Hazard. Mater.*, 2009, **166**, 1415–1420.
- 18 L. Wang, A.Q. Wang, *J. Hazard. Mater.*, 2007, **147**, 979–985.
- 19 L. Wang, A.Q. Wang, *J. Chem. Technol. Biotechnol.*, 2007, **82**, 711–720.
- 20 S. Chatterjee, M. W. Lee and S. H. Woo, *Chem. Eng. J.*, 2009, **155**, 254–259.
- 21 Y. X. Zhang, S. C. Xu, Y. Y. Luo, S. S. Pan, H. L. Ding and G. H. Li, *J. Mater. Chem.*, 2011, **21**, 3664–3671.
